# Supplementary material for: Highly conductive grain boundaries in cold-sintered barium zirconate-based proton conductors
Source: Royal Society of Chemistry journal article supplement (doi:10.1039/d3ta07076j), 2023-12-27
Supplement: d3ta07076j1.pdf [file d3ta07076j1.pdf]

## Supplementary information to the manuscript:

### Highly conductive grain boundaries in cold-sintered barium zirconate-based proton conductors

Moritz Kindelmann<sup>1,2,3,\*</sup>, Sonia Escolastico<sup>4</sup>, Laura Almar<sup>4</sup>, Ashok Vayyala<sup>1,2</sup>, Dylan Jennings<sup>2,3</sup>, Wendelin Deibert<sup>3</sup>, Wilhelm Albert Meulenber<sup>3</sup>, Wolfgang Rheinheimer<sup>3</sup>, Martin Bram<sup>3</sup>, Jose Serra<sup>4,\*</sup>, Joachim Mayer<sup>1,2</sup>, Olivier Guillon<sup>3,5,\*</sup>

<sup>1</sup> RWTH Aachen University, Central Facility for Electron Microscopy (GFE), 52074 Aachen, Germany

<sup>2</sup> Forschungszentrum Jülich GmbH Ernst Ruska-Centre for Microscopy and Spectroscopy with Electrons (ER-C), 52425 Jülich, Germany

<sup>3</sup> Forschungszentrum Jülich GmbH, Institute of Energy and Climate Research, Materials Synthesis and Processing (IEK-1), 52425, Jülich, Germany

<sup>4</sup> Instituto de Tecnología Química, Universitat Politècnica de València-Consejo Superior de Investigaciones Científicas, 46022, Valencia, Spain

<sup>5</sup> Jülich Aachen Research Alliance, JARA-Energy, 52425, Jülich, Germany

Corresponding authors:

[m.kindelmann@fz-juelich.de](mailto:m.kindelmann@fz-juelich.de)

[jmserra@itq.upv.es](mailto:jmserra@itq.upv.es)

[o.guillon@fz-juelich.de](mailto:o.guillon@fz-juelich.de)

### Microstructure development after thermal post treatments (TPT)

To understand the influence of thermal post-treatments on the microstructure development after cold sintering, a systematic variation between 1100 °C and 1600 °C has been conducted. Representative microstructures are displayed in Fig. S1. Temperatures at 1100 °C are not sufficient to reform the phase which can also be observed in the fine and porous microstructure. The stepwise increase of annealing temperatures leads to higher densities as well as an increase in grain size. Annealing at temperatures from 1500 °C show a comparable microstructure to samples produced by SSRS, which can be associated with

the solution of residual NiO and the formation of the SSRS specific transient  $\text{BaY}_2\text{NiO}_5$  phase that promotes grain growth.

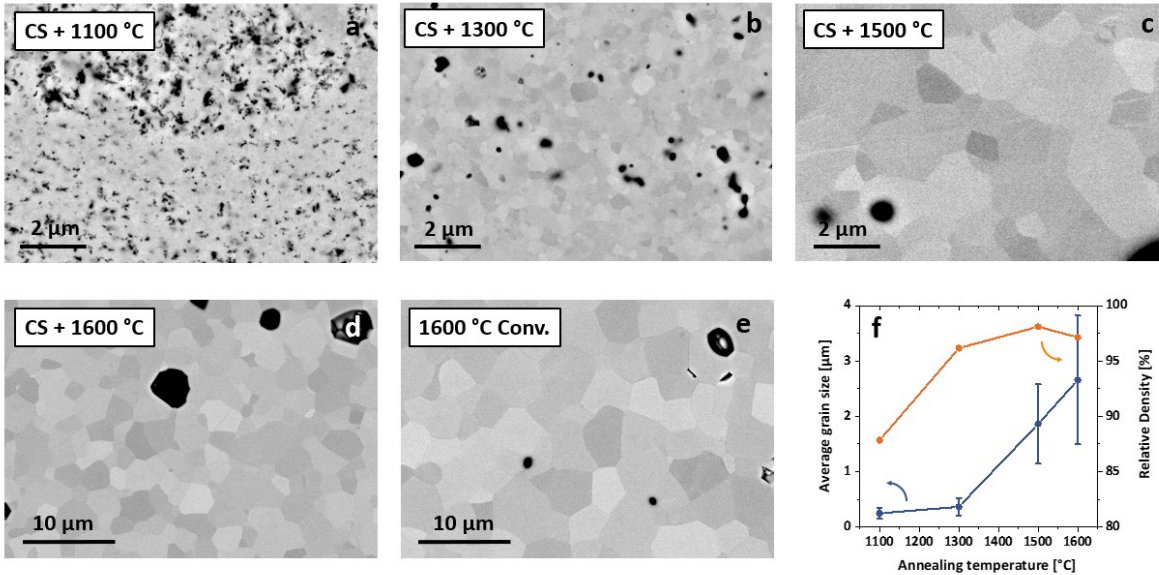

**Figure S1: Microstructure development after thermal post treatments.** Representative cross-sectional SEM images of TPT samples treated at (a) 1100 °C, (b) 1300 °C, (c) 1500 °C and (d) 1600 °C. For comparison the microstructure of a conventional processed sample at 1600 °C is also shown (e). Additionally, figure 1g is reprinted here (f) to add information on the relative density and average grain size (derived from EBSD measurements) of the shown microstructures.

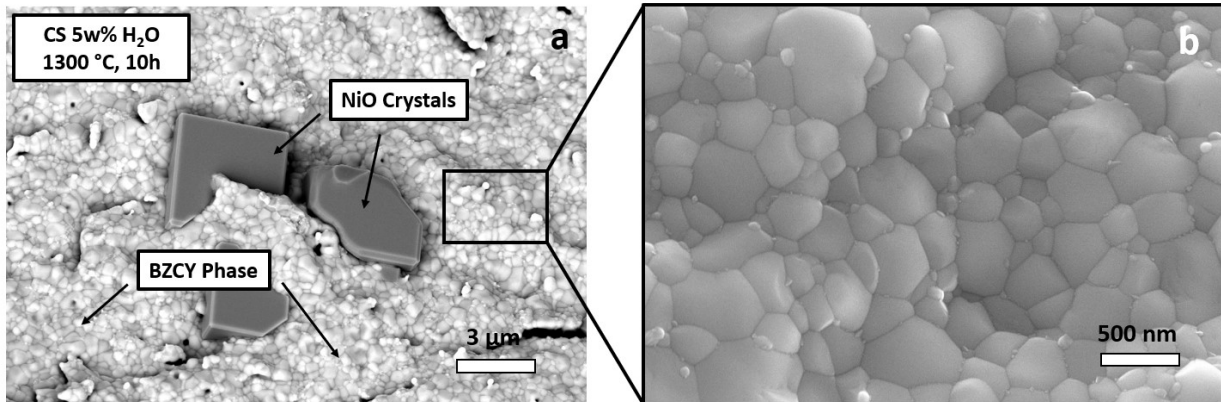

**Figure S2: Overview of the microstructure of TPT1300 samples.** (a) SEM image of a fracture surface of TPT 1300 sample showing embedded NiO crystals. (b) Higher magnification SEM image of the nano-grained BZCY microstructure.

The presence of NiO in TPT1300 samples could not be shown using XRD due to the very low amounts present in the applied powders. However, low amounts of embedded NiO crystals can be found in SEM images of fracture surfaces made from samples annealed at 1300 °C (Fig. S2 a).

The NiO secondary particles clearly show that our processing approach can prevent the formation of a transient  $\text{BaY}_2\text{NiO}_5$  phase improving the electrochemical performance of fine-grained BZCY, which was processed at comparably low temperatures.

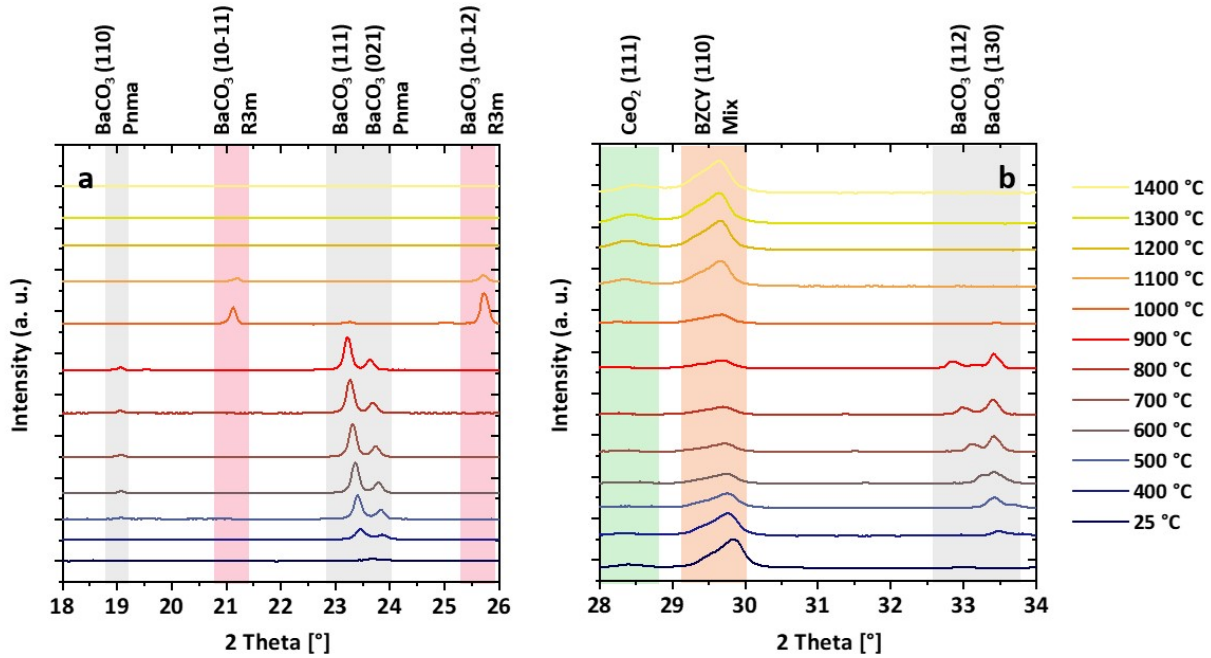

**Figure S3: HT-XRD measurements highlighting the in-situ phase changes during thermal annealing.** (a) Section of the diffractogram from 18 – 26 ° highlighting the formation and decomposition of  $\text{BaCO}_3$ . (b) Section of the diffractogram from 28 – 34 ° showing the (110) peak of the BZCY phase as well as  $\text{CeO}_2$  and  $\text{BaCO}_3$  secondary phases.

Additional to ex-situ XRD investigations, which are included in the main manuscript, a HT-XRD study was performed to investigate the reformation process of the perovskite phase after cold sintering. The heating rate and holding times at every temperature are 5 K/min and 1h, respectively. A downside of these measurements is that they are not suitable to reproduce the real annealing cycle applied in the main study, where a constant heating rate to high temperatures and an extended dwell time of 10 h is applied. Additionally, decomposition processes are observed at the surface of the measured pellet during in-situ XRD reducing the significance for bulk processes. Additionally, the temperature measurement in the applied setup has a mismatch of around 100 K due to thermal conduction through the sample. However, several processes that are also discussed

in the main text can be observed here: (1) Formation of  $\text{BaCO}_3$  from  $\text{Ba(OH)}_2$  species in the pellet beginning at 400 °C. The formation is associated with a simultaneous decrease of the BZCY perovskite peak intensity. (2) Phase change of the  $\text{BaCO}_3$  Pnma phase to the high temperature R3m phase between 900 and 1000°C and the subsequent decomposition of  $\text{BaCO}_3$  above 1100°C. (3) Formation of a clear  $\text{CeO}_2$  (111) signal at  $2\theta = 28.3^\circ$  at temperatures above 1100 °C. The HT-XRD investigations clearly support the reaction pathway that is described in the manuscript. Despite the mismatch between the thermal history of the HT-XRD and the TPT applied in the main study (the solution of  $\text{CeO}_2$  and  $\text{Y}_2\text{O}_3$  into the perovskite phase cannot be tracked), important additional information can be derived from these experiments.

### **Electrochemical characterization and conductivity performance benchmark**

In the following, additional electrochemical data is presented and detailed to highlight the performance of low temperature processed BZCY in comparison to its conventionally processed counterpart. Fig. S4 shows an extended figure including additional EIS data of the TPT1500 sample (a-c) and exemplary raw data measurements of TPT1300 and CONV1600 (d-f). Even though the TPT1500 sample has been exposed to higher temperatures and experienced a decent amount of grain growth the electrochemical performance is still comparable to TPT1300. Slight changes in the activation energy might be associated to a different chemistry at the grain boundary after complete solution of NiO and other residual phases like  $\text{Y}_2\text{O}_3$ .

Furthermore, exemplary EIS measurements (in Fig S4 d and e) highlight the strong differences between the electrochemical response of low temperature and conventional processed BZCY. Through our novel processing route, the grain boundary resistivity plays a minor role in the total conductivity of the BZCY electrolyte. The bulk conductivity of both samples however is in a comparable range.

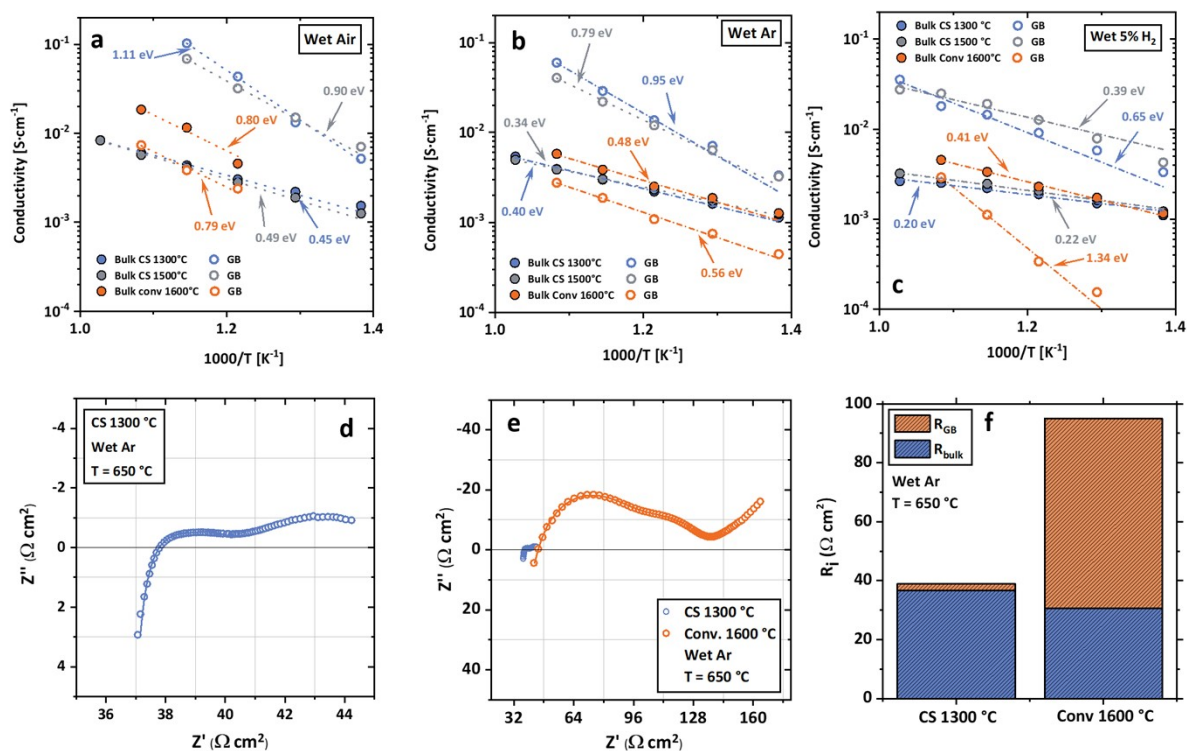

**Figure S4: Extended electrochemical impedance data of low-temperature processed BZCY.** Electrochemical impedance spectroscopy (EIS) of CONV (1600 °C, 5 h), TPT1300 (1300 °C, 10 h) and TPT1500 BCZY in wet air (a), wet Ar (b), and wet H<sub>2</sub> (c) (all 3% H<sub>2</sub>O). Full circles represent the bulk conductivity, and empty circles represent the grain boundary conductivity. (d) Nyquist plot of a EIS measurement of TPT1300 at 650 °C in wet Ar and a comparison graph including the same measurement of a CONV1600 sample (e). (f) Comparing the bulk and grain boundary conductivity of the measurements shown in (d, e).

Next to the measurement of the H/D isotopic effect in wet reducing atmospheres, comparable investigations were made in dry Ar and wet Ar (H<sub>2</sub>O and D<sub>2</sub>O). BZCY electrolytes processed through our new low temperature route reveal a very comparable performance to conventionally sintered BZCY. The TPT temperature has no visible effect on the measured conductivity in all three atmospheres, which additionally highlights the neglectable influence of grain boundaries in cold sintered and thermally treated BZCY (especially in TPT1300 where a high grain boundary density is present).



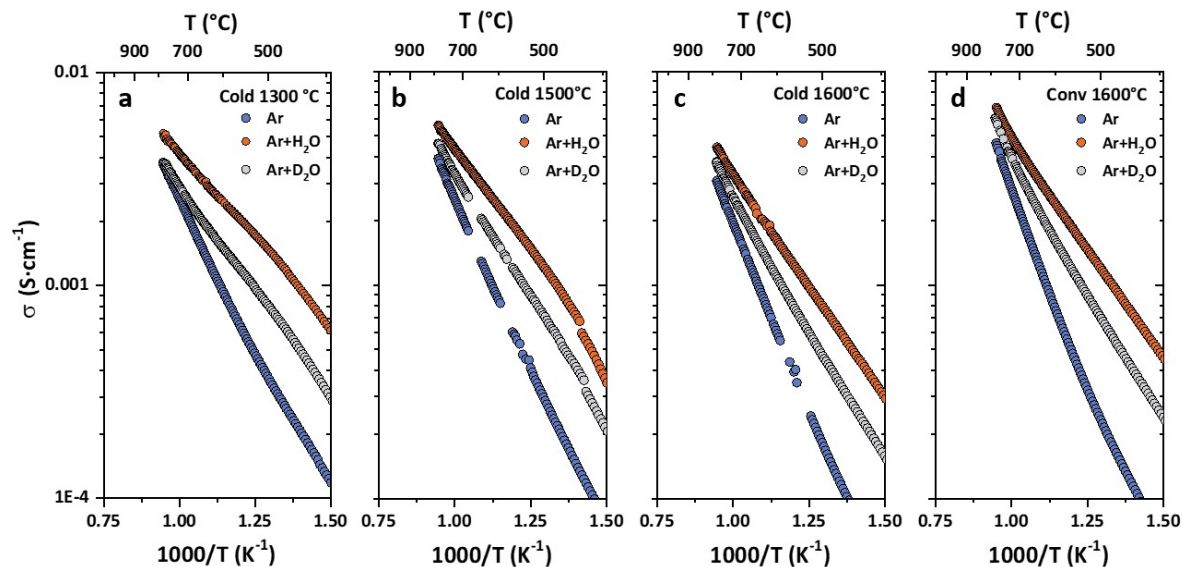

**Figure S5: H/D effect on the conductivity measurements in Ar atmosphere.** DC conductivity of different BZCY samples in dry and wet Ar (3% H<sub>2</sub>O and 3% D<sub>2</sub>O). (a) TPT1300, (b) TPT1500, (c) TPT1600 and (d) CONV1600.

The total conductivity at 600 °C is used as a benchmark value in Fig. 3f comparing it to the maximal sintering temperature and sintering technique. In Fig. S6 and Tab. S1 the literature sources as well as additional details on the composition and test conditions are given.

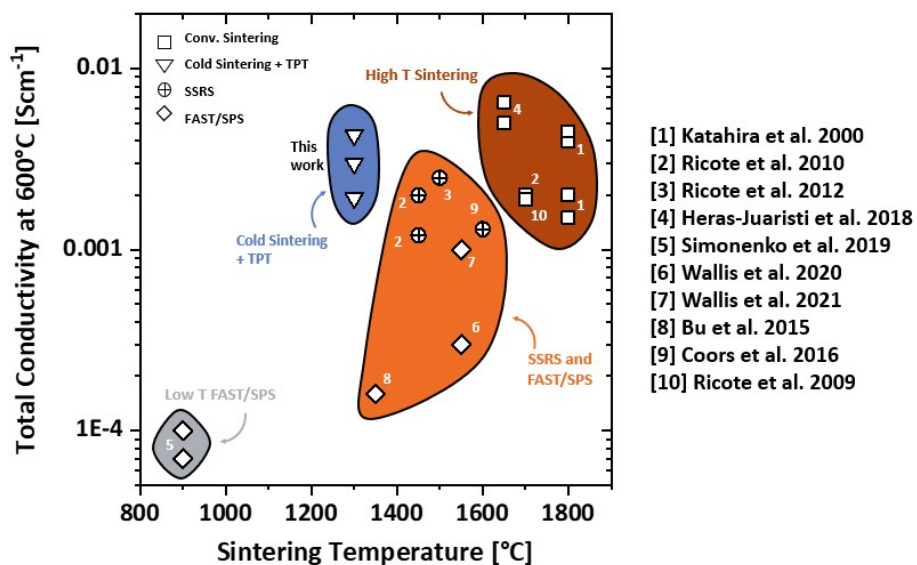

**Figure S6: Performance benchmark of low-temperature processed BZCY.** The total conductivity at 600 °C is correlated to the maximal sintering temperature. Additionally, the applied sintering technique is highlighted through different colors and markers.

**Table S1: Literature overview of conductivity values at 600 °C of Zr-rich BZCY compositions.**

| Material | Method               | Sintering T [°C] | Sintering time [h/min] | Sintering aid [w%] | Conductivity at 600 ° [S/cm]C | Atmosphere                                                            | Reference |
|----------|----------------------|------------------|------------------------|--------------------|-------------------------------|-----------------------------------------------------------------------|-----------|
| BZCY63   | Conventional         | 1800             | 5 h                    | ---                | 0,002                         | wet H <sub>2</sub> pH <sub>2</sub> O 1.7x10 <sup>3</sup>              | 1         |
| BZCY81   | Conventional         | 1800             | 5 h                    | ---                | 0,0015                        | wet H <sub>2</sub> pH <sub>2</sub> O 1.7x10 <sup>3</sup>              | 1         |
| BZCY63   | Conventional         | 1800             | 5 h                    | ---                | 0,004                         | wet air pH <sub>2</sub> O 1.7x10 <sup>3</sup>                         | 1         |
| BZCY81   | Conventional         | 1800             | 5 h                    | ---                | 0,0045                        | wet air pH <sub>2</sub> O 1.7x10 <sup>3</sup>                         | 1         |
| BZCY72   | Conventional         | 1700             | 6 h                    | ---                | 0,002                         | wet H <sub>2</sub> N <sub>2</sub> (9%), pH <sub>2</sub> O = 0.015 atm | 2         |
| BZCY72   | SSRS                 | 1450             | 6 h                    | 1 Ni               | 0,002                         | wet H <sub>2</sub> N <sub>2</sub> (9%), pH <sub>2</sub> O = 0.015 atm | 2         |
| BZCY72   | SSRS                 | 1450             | 6 h                    | 2 Ni               | 0,0012                        | wet H <sub>2</sub> N <sub>2</sub> (9%), pH <sub>2</sub> O = 0.015 atm | 2         |
| BZCY72   | SSRS                 | 1500             | 4 h                    | 1 Ni               | 0,0025                        | wet 9% H <sub>2</sub> in N <sub>2</sub> (0.015 atm H <sub>2</sub> O)  | 3         |
| BZCY72   | Conventional         | 1650             | 4-8 h                  | ---                | 0,005                         | wet N <sub>2</sub>                                                    | 4         |
| BZCY72   | Conventional         | 1650             | 4-8 h                  | ---                | 0,0065                        | wet air                                                               | 4         |
| BZCY81   | SPS                  | 900              | 5 min                  | ---                | 0,00007                       | atmosphere air                                                        | 5         |
| BZCY63   | SPS                  | 900              | 5 min                  | ---                | 0,0001                        | atmosphere air                                                        | 5         |
| BZCY72   | SPS                  | 1550             | 5 min                  | ---                | 0,0003                        | wet %5H <sub>2</sub> /Ar                                              | 6         |
| BZCY72   | SPS                  | 1550             | 5 min                  | ---                | 0,001                         | 5% H <sub>2</sub> , 3 kPa H <sub>2</sub> O                            | 7         |
| BZCY72   | SPS                  | 1350             | 5 min                  | ---                | 0,00016                       | Wet H <sub>2</sub>                                                    | 8         |
| BZCY72   | SSRS                 | 1600             | 16 h                   | 1 Ni               | 0,0013                        | 5% H <sub>2</sub> , 3 kPa H <sub>2</sub> O                            | 9         |
| BZCY72   | Conventional         | 1700             | 6 h                    | ---                | 0,0019                        | 9% H <sub>2</sub> , 1.5 kPa H <sub>2</sub> O                          | 10        |
| BZCY72   | Cold sintering + TPT | 1300             | 10 h                   | 0.5 Ni             | 0,004                         | 3% H <sub>2</sub> O air, Ar, H <sub>2</sub>                           | This work |

## Atom Probe Tomography

In Fig. 4c of the main manuscript a cropped version of the data complete APT dataset is shown. Fig. S7 displays the full dataset of the measured APT needle, including three grain boundaries highlighted through the Y and Ni segregation as well as a  $Y_2O_3$  secondary phase grain. The already discussed Ce heterogeneity is clearly visible in the overview image and the grain boundary proxigrams (Fig. S7 b, c). Additionally, segregation phenomena at the heterointerface between BZCY and the  $Y_2O_3$  secondary phase can be observed.

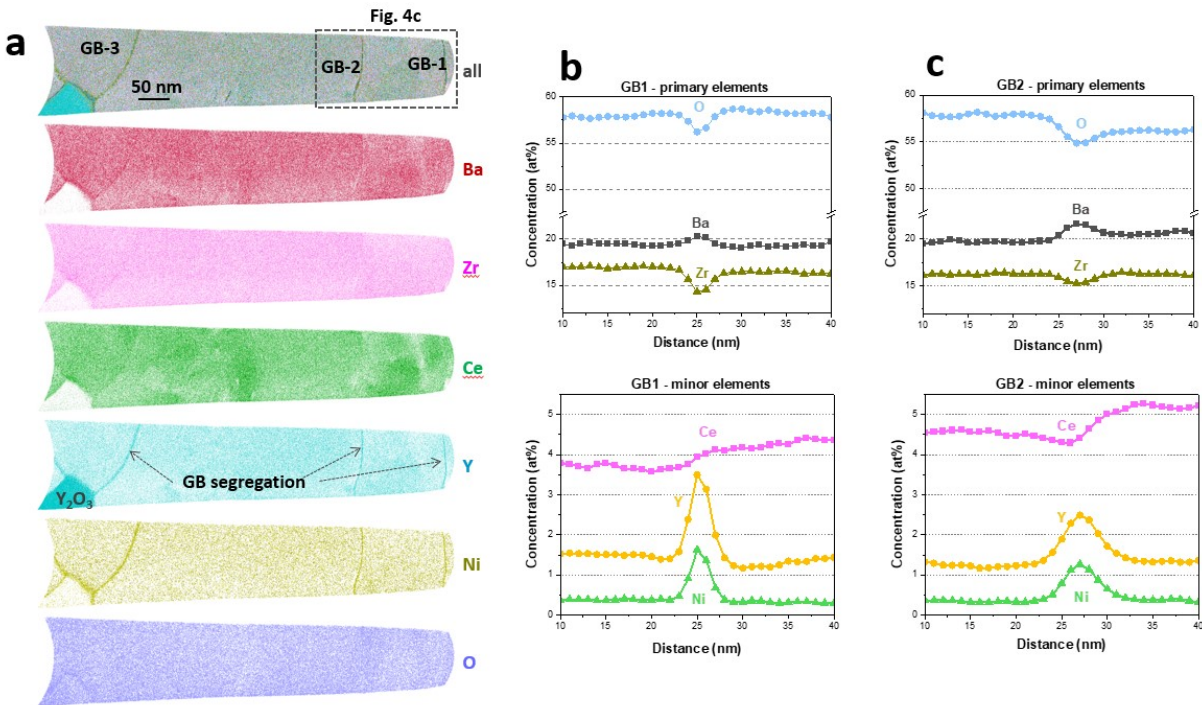

**Figure S7: Atom probe tomography of interfaces in the TPT1300 BZCY sample.** (a) Full data set of the measured APT needle highlighting the detail that is used in Fig. 4c. The nano-crystallinity of the sample enables a simultaneous measurement of three GBs. (b, c) Line scans derived from grain boundary 1 and 2 showing comparable characteristics.



## References

- 1 K. Katahira, Y. Kohchi, T. Shimura and H. Iwahara, *Solid State Ionics*, 2000, **138**, 91–98.
- 2 S. Ricote and N. Bonanos, *Solid State Ionics*, 2010, **181**, 694–700.
- 3 S. Ricote, N. Bonanos, A. Manerbino and W. G. Coors, *Int. J. Hydrogen Energy*, 2012, **37**, 7954–7961.
- 4 G. Heras-Juaristi, U. Amador, R. O. Fuentes, A. L. Chinelatto, J. Romero De Paz, C. Ritter, D. P. Fagg, D. Pérez-Coll and G. C. Mather, *J. Mater. Chem. A*, 2018, **6**, 5324–5334.
- 5 T. L. Simonenko, M. V. Kalinina, N. P. Simonenko, E. P. Simonenko, O. V. Glumov, N. A. Mel'nikova, I. V. Murin, O. O. Shichalin, E. K. Papynov, O. A. Shilova, V. G. Sevastyanov and N. T. Kuznetsov, *Int. J. Hydrogen Energy*, 2019, **44**, 20345–20354.
- 6 J. Wallis, L. Urban, C. Grimmer, W. Bodnar, R. Zimmermann, S. Ricote, K. D. Weltmann, E. Burkel and A. Kruth, *Solid State Ionics*, 2020, **345**, 115118.
- 7 J. Wallis, S. Ricote, K. D. Weltmann, E. Burkel and A. Kruth, *Ceram. Int.*, 2021, **47**, 15349–15356.
- 8 J. Bu, P. G. Jönsson and Z. Zhao, *Scr. Mater.*, 2015, **107**, 145–148.
- 9 W. G. Coors, A. Manerbino, D. Martinefski and S. Ricote, *Perovskite Mater. Characterisation, Prop. Appl.*, 2016, 84–106.
- 10 S. Ricote, N. Bonanos and G. Caboche, *Solid State Ionics*, 2009, **180**, 990–997.
